**Donor-recipient interactions drive dynamics of horizontal gene transfer via natural competence**

Yu-Yu Cheng<sup>1</sup>, James M. Papadopoulos<sup>1,3</sup>, Tanya Falbel<sup>2</sup>, Briana M. Burton<sup>2</sup>, and Ophelia S. Venturelli<sup>1,2,3\*</sup>

<sup>1</sup>Department of Biochemistry, University of Wisconsin - Madison, WI, United States

<sup>2</sup>Department of Bacteriology, University of Wisconsin - Madison, WI, United States

<sup>3</sup>Department of Chemical & Biological Engineering, University of Wisconsin-Madison

\*To whom correspondence should be addressed: [venturelli@wisc.edu](mailto:venturelli@wisc.edu)

## 1 ABSTRACT

2 Horizontal gene transfer (HGT) in microbial communities is shaped by a complex web of abiotic  
3 and biotic interactions. We investigate the role of donor-recipient interactions on the dynamics of  
4 HGT via natural competence in a synthetic community. We show that the donor can play an active  
5 role in the gene transfer process that depends on the source of the transferred DNA. The  
6 efficiency of plasmid gene transfer depends on the abundance of the donor strain, whereas donor  
7 growth impairment augments the efficiency of chromosomal gene transfer. We show that  
8 antibiotic stress can either diminish or enhance the efficiency of gene transfer. A dynamic  
9 computational model of the system captures the impact of donor growth perturbations on gene  
10 transfer efficiency. Our results suggest that anti-HGT strategies targeting the donor strain can  
11 lead to opposing effects on the rate of HGT that depend on the microbial interaction network and  
12 source of transferred DNA.

## 13 INTRODUCTION

14 Horizontal gene transfer (HGT) is a major mechanism of genetic variation in microbial  
15 communities that enables the acquisition of new functional capabilities (1). Horizontally acquired  
16 sequences can provide a selective advantage by facilitating evolutionary adaptation to changing  
17 environments (2). Conjugation and natural transformation are prevalent processes that enable  
18 HGT in bacterial communities. Conjugation involves cell-to-cell contact between a donor and  
19 recipient cell and thus the live donor cell actively participates in the HGT process (3). By contrast,  
20 extracellular DNA (eDNA) can be acquired by a recipient cell that has activated the natural  
21 competence pathway in the absence of living donor cells (4). The capability for natural  
22 competence is widespread across Gram-positive and Gram-negative bacteria (5) and is also a  
23 common trait among bacterial pathogens (6). For example, inter-species or intra-strain gene  
24 transfer (7–9) via natural transformation is implicated in the ability of *Streptococcus pneumoniae*  
25 (*S. pneumoniae*) to adapt and persist on a human host. In *Bacillus subtilis* (*B. subtilis*), natural  
26 competence is a major driver of genome diversity, which has enabled this species to secure  
27 niches in animal, plant, soil and marine environments (10).

28  
29 The molecular and ecological factors that determine the rate of eDNA release or transfer  
30 of DNA between donor and recipient in microbial communities are not well understood. The  
31 current paradigm for natural competence requires the presence of eDNA and recipient cells that  
32 have activated the natural competence program. However, interactions between living donor and  
33 recipient have been shown to influence HGT frequencies in microbial communities. Specific  
34 naturally competent species can exploit predation to enhance DNA release from intact or recently  
35 killed donor cells. For example, *Acinetobacter baumannii*, *Vibrio cholerae* and *S. pneumoniae* can  
36 play an active role in gene transfer via predation using type-VI secretion systems or bacteriocins  
37 to enhance DNA release (11–13). Further, spatial proximity was a major factor for gene transfer  
38 between specific donors and recipients using conjugation-independent mechanisms. For instance,  
39 spatial proximity was shown to enhance intra-strain gene transfer in *B. subtilis*, *Porphyromonas*  
40 *gingivalis* and *Pseudomonas stutzeri*, as well as inter-species gene transfer between the donor  
41 *Escherichia coli* (*E. coli*) and recipient *Vibrio* species (14–17). However, there are many  
42 unresolved questions about the role of donor-recipient interactions on gene transfer via natural  
43 competence in microbial communities.

44 The source DNA for natural transformation can be derived from the donor cell  
45 chromosome or plasmids harbored by the donor, as opposed to conjugation which is primarily  
46 selective for mobile plasmids. Plasmids or chromosome as source molecules for gene transfer  
47 exhibit differences in copy number (18, 19), stability in the extracellular environment (20), release  
48 profiles as a function of growth stage (21–23) and molecular mechanisms of DNA uptake by the  
49 recipient cell (5). In addition to these properties, multi-copy plasmids can impose a substantial  
50 metabolic burden by sequestering intracellular cellular resources, leading to substantial changes

51 in metabolic and stress response activities, cell morphology and growth rate (24–26). However,  
52 the effects of plasmid metabolic burden on rates of HGT in microbial communities has not been  
53 investigated.

54 To address these gaps, we investigate gene transfer dynamics in a synthetic consortium  
55 composed of the genetically manipulable donor and recipient species *E. coli* and *B. subtilis*. Using  
56 a systems-level approach, we demonstrate that donor-recipient interactions and the source of the  
57 transferred sequences (plasmid or chromosome) are major factors influencing the efficiency of  
58 HGT and its dependence on environmental factors. We find that the presence of the *E. coli* donor  
59 substantially enhances plasmid transfer compared to purified DNA, whereas the reciprocal trend  
60 is observed for chromosomal transfer. We construct dynamic computational models of species  
61 growth and HGT via natural competence to further dissect the interactions between donor and  
62 recipient in the system. To test the model predictions, we selectively modulate the growth of the  
63 donor by administering antibiotics, introducing plasmids with a range of metabolic costs or tuning  
64 the rate of cell lysis. Our data show that the abundance of the donor is positively correlated with  
65 plasmid HGT efficiency, whereas substantial donor growth impairment is required for transfer of  
66 chromosomal sequences, consistent with the model predictions. Antibiotic stress can either  
67 enhance or reduce the transfer efficiency of plasmid derived genes. In sum, our results indicate  
68 environmental perturbations that impact the growth of the donor in microbial communities can  
69 differentially impact horizontal gene transfer rates derived from plasmid or chromosomal origins.

70

## 71 RESULTS

72

### 73 Temporal characterization of inter-species gene transfer in a synthetic community

74 To study the factors influencing the frequency of HGT in microbial communities, we constructed  
75 a synthetic community composed of two distantly related species *E. coli* (donor) and *B. subtilis*  
76 (recipient). An integration cassette comprised of 500 bp sequences homologous to the *B. subtilis*  
77 chromosome flanking a spectinomycin resistance gene (*specR*) was introduced into an *E. coli*  
78 plasmid or an erythromycin resistance gene (*ermR*) was integrated onto the *E. coli* chromosome.  
79 To characterize the dynamics of gene transfer, we performed time-series measurements of  
80 absolute species abundance, integration cassette extracellular DNA (eDNA) concentration and *B.*  
81 *subtilis* transformation frequency in the presence of purified DNA (100 ng mL<sup>-1</sup> plasmid or  
82 chromosomal DNA) or living *E. coli* harboring the plasmid (*Ec-P*) or chromosomal cassette (*Ec-*  
83 *C*) in monoculture or co-culture (**Figs. 1 and 2 (A and E)**). Transformation frequency or HGT  
84 efficiency was defined as the fraction of *B. subtilis* colony forming units (CFU) that were resistant  
85 to the antibiotic gene contained in the integration cassette divided by the total number of *B. subtilis*  
86 CFU. To enable control of competence activity, a second copy of the master regulator *comK* was  
87 introduced onto the *B. subtilis* chromosome under control of a xylose-inducible promoter (27).

88 *B. subtilis* exhibited a lower growth rate and carrying capacity in the presence of *E. coli*,  
89 whereas the presence of *B. subtilis* did not impact the growth of *E. coli*, indicating a negative inter-  
90 species interaction from *E. coli* to *B. subtilis* (**Fig. 2, B and F**). Although the *E. coli* growth  
91 response was not altered in the presence of *B. subtilis*, the eDNA concentration was substantially  
92 higher in the co-culture than in the *E. coli* monoculture (**Fig. 2, C and G**). Notably, the efficiency  
93 of plasmid transfer was significantly enhanced across all time points by up to ~480-fold at 8 hr in  
94 the co-culture compared to *B. subtilis* monoculture supplemented with purified plasmid DNA,  
95 demonstrating that inter-species interactions were a critical determinant of HGT efficiency (**Fig.**  
96 **2D**). Corroborating this result, the HGT efficiency of a co-culture containing native *comK* *B. subtilis*  
97 PY79 (WT *B. subtilis*) and *Ec-P* was substantially higher than the WT *B. subtilis* monoculture  
98 exposed to purified plasmid DNA, indicating that the observed increase in HGT efficiency was not  
99 attributed to synthetic control of the competence pathway (**fig. S1A**). In addition, *E. coli* negatively  
100 impacted WT *B. subtilis* growth by a smaller magnitude compared to engineered *B. subtilis*,  
101 suggesting that the xylose-induced competence-dependent growth arrest may further reduce the

102 competitive ability of *B. subtilis* in the community (**Fig. 2 (B and F) and fig. S1B**). By contrast,  
103 transformants were not detected at any time point in the *Ec-C* co-culture and a low transformation  
104 frequency was observed in the *B. subtilis* monoculture in the presence of purified chromosomal  
105 DNA, indicating that the efficiency of chromosomal transfer was reduced in the presence of the  
106 donor species (**Fig. 2H**).

107 The critical role of the *E. coli* donor in enhancing plasmid transfer efficiency suggested  
108 that plasmid transfer may involve mechanisms akin to conjugation. Since natural competence  
109 involves eDNA released from the donor, we tested whether eDNA was required for inter-species  
110 gene transfer by introducing a DNA degrading enzyme (DNase I) into the co-culture. In the  
111 presence of DNase I, no transformants were detected in the *Ec-P* and *B. subtilis* co-culture,  
112 corroborating that HGT occurred via natural transformation (**fig. S2A**).

113 Since spatial proximity between donor and recipient was shown to enhance gene transfer  
114 by natural competence in other systems (11, 12, 14, 17), we next sought to characterize the effect  
115 of spatial proximity in the *Ec-P* and *B. subtilis* co-culture. *Ec-P* and *B. subtilis* were physically  
116 separated by a 0.4  $\mu\text{m}$  filter, which prevented cell-to-cell contact while allowing exchange of  
117 diffusible molecules (**fig. S2B**). The HGT efficiency of the physically separated co-culture  
118 condition was 25-fold lower compared to the well-mixed condition in the absence of the filter,  
119 indicating that spatial proximity between donor and recipient enhanced HGT efficiency.

120 We next used fluorescence microscopy to visualize the spatial distribution of *E. coli* and  
121 *B. subtilis* cells in the mixed culture. The RFP-labeled *E. coli* and GFP-labeled *B. subtilis* were in  
122 close spatial proximity after 3 hr (**fig. S2C**). To quantify the spatial distribution of *B. subtilis* in the  
123 presence and absence of *E. coli*, each image was partitioned into regions of interest (ROI)  
124 containing single or groups of cells in close spatial proximity. Our results showed that 99% of *B.*  
125 *subtilis* (at least 1000 cells) were found in close proximity to *E. coli* and the number of cells within  
126 ROI containing both species was higher on average compared to the number of cells within ROI  
127 containing a single species (**fig. S2D**). In addition, the average number of *E. coli* cells within *E.*  
128 *coli* only ROI was higher than the number of *B. subtilis* in *B. subtilis* only ROI (**fig. S2D**). These  
129 data suggest that *E. coli* can self-aggregate in the presence or absence of *B. subtilis*, whereas  
130 aggregation of *B. subtilis* occurs more frequently in the presence of *E. coli*. In sum, these data  
131 suggest that spatial proximity and cell-to-cell contact between donor and recipient may influence  
132 plasmid transfer efficiency via natural competence.

133 The *B. subtilis* competence developmental program is regulated by a complex and  
134 dynamic regulatory network that activates the pathway in a subpopulation of cells in response to  
135 specific extracellular signals (28). Therefore, we sought to test whether the presence of *E. coli*  
136 impacted the activation response of the competence pathway. To quantify the expression of the  
137 competence pathway, we performed time-series flow cytometry measurements of *B. subtilis*  
138 harboring a *comK* promoter ( $P_{\text{comK}}$ ) fused to GFP in the presence and absence of *Ec-P* labeled  
139 with constitutive RFP. In the presence and absence of *Ec-P*, the fraction of cells expressing GFP  
140 (GFP-ON state) increased and then decreased over time, consistent the previously characterized  
141 transient activation of the pathway in a sub-population of cells (**fig. S3**) (28). These data suggest  
142 that the observed enhancement of plasmid transfer efficiency in the presence of *Ec-P* was not  
143 attributed to changes in the activation response of competence pathway across the population.

144 We next explored whether the differences in HGT efficiencies in the co-culture compared  
145 to monoculture conditions could be explained by variations in eDNA concentration. The eDNA  
146 concentrations observed in the co-cultures and monocultures (100 ng mL<sup>-1</sup> purified DNA) were in  
147 the saturated regime of the eDNA-transformation frequency dose-response curve ( $\sim 10^2$ - $10^3$  ng  
148 mL<sup>-1</sup> for plasmid and  $\sim 10^0$ - $10^2$  ng mL<sup>-1</sup> for chromosome) (horizontal lines in **Fig. 2I**), suggesting  
149 that eDNA concentration was not a limiting factor for gene transfer. After accounting for  
150 differences in gene copy numbers, the chromosome and plasmid transformation frequency were  
151 similar for the *B. subtilis* monoculture exposed to purified DNA, with a moderate and statistically

152 significant increase in efficiency for chromosome than plasmid derived genes (**Fig. 2J**). These  
153 data suggest the majority of the differences in the efficiency of chromosomal and plasmid gene  
154 transfer in the *B. subtilis* monoculture condition could be explained variation in gene copy number,  
155 as opposed to other properties of the DNA including topology (e.g. circular, linear or  
156 strandedness), size, stability, or sequence. By ruling out *B. subtilis* competence activity, eDNA  
157 concentration and properties as major determinants of transformation frequency in the synthetic  
158 community, we next investigated how the inter-species interaction between *E. coli* and *B. subtilis*  
159 influenced HGT dynamics.

### 160 **Dynamic computational modeling of community dynamics and HGT**

161 To interrogate the mechanisms that influence gene transfer, we developed a dynamic  
162 computational model that represents species growth modified by inter-species interactions, eDNA  
163 release and HGT (**Supplementary Materials**). The model captures the temporal changes in live  
164 *E. coli* (*E*), dead *E. coli* (*Ed*), *B. subtilis* (*B*), eDNA (*G*), and transformed *B. subtilis* (*Bt*) (**Fig. 3A**).  
165 We represent species growth dynamics and microbial interactions using terms from the Lotka-  
166 Volterra model (29). To account for the time-delays in eDNA release relative to *E. coli* growth (**Fig.**  
167 **2, B, C, F, and G**), *E* is converted into *Ed* at a constant rate and *Ed* releases *G* as a function of *B*  
168 and *Ed*. Our data showed that the extracellular concentration of plasmid increased in the *B.*  
169 *subtilis* monoculture condition, whereas the extracellular chromosome concentration displayed  
170 the reciprocal temporal trend (**Fig. 2, C and G**). To capture these temporal trends, we assume  
171 that *G* can be produced at a rate proportional to *B* and degraded at a rate proportional to *B* or *E*.  
172 In addition, we assume the transformation frequency of *B* depends on *E* and the presence of *G*,  
173 to represent the observed differences in transformation frequency in co-culture and monoculture  
174 conditions (**Fig. 2, D and H**).

175 The model was fit to the time-series measurements of CFU, eDNA, and transformation  
176 frequency and was able to recapitulate the temporal changes across conditions (**Fig. 2, B, C, D,**  
177 **F, G, and H**). To further understand the differences in molecular mechanisms between the *Ec-P*  
178 and *Ec-C* co-cultures, we computed the fold-change of each inferred parameter between the two  
179 models (**Fig. 3A**). The inter-species interaction coefficient  $\alpha_{eb}$  representing the impact of *B* on the  
180 growth rate of *E* was substantially larger in magnitude in the *Ec-P* model compared to the *Ec-C*  
181 model, suggesting that plasmid metabolic burden can alter the magnitude of inter-species  
182 competition by reducing the fitness of *E. coli*, which in turn enhances the competitive ability of *B.*  
183 *subtilis*. In addition, the chromosome degradation rate  $\gamma_g$  was significantly larger than plasmid,  
184 consistent with the enhanced persistence of plasmid than chromosomal DNA over time in the  
185 environment (20). To investigate the contribution of each parameter to the efficiency of HGT, each  
186 parameter was perturbed by  $\pm 20\%$  and the transformation frequency, defined as the ratio of *Bt*  
187 to the sum of *B* and *Bt*, was determined at 6 hr (**Fig. 3B**). Notably, increasing the death rate of  
188 *Ec-P* or *Ec-C* ( $\gamma_e$ ) has opposing effects on the HGT efficiency in the model.

189 To test the model predicted effects of *E. coli* death rate on HGT efficiency, we introduced  
190 an IPTG-inducible phage  $\phi$ X174 lysis gene *E* into *Ec-P* and *Ec-C* to program the donor lysis rate  
191 (**Fig. 3, C and E**). The eDNA concentration increased substantially as a function of IPTG,  
192 demonstrating that enhanced expression of lysis gene *E* triggered donor lysis and eDNA release  
193 (**fig. S4**). In both communities, the abundance of *B. subtilis* and *E. coli* displayed opposing trends  
194 as a function of IPTG, consistent with relationship between  $\gamma_e$  and species abundance in the  
195 models (**Fig. 3, C, D, E and F**). Notably, the transformation frequency in the *B. subtilis* and *Ec-P*  
196 co-culture exhibited a decreasing trend with IPTG concentration, consistent with the relationship  
197 between  $\gamma_e$  and transformation frequency in the plasmid model (**Fig. 3, C and D**). The reciprocal  
198 pattern was observed for the *Ec-C* community wherein transformants were only detected at high  
199 IPTG concentrations, reflecting a moderate increase in transformation frequency as a function of  
200  $\gamma_e$  in the chromosome model (**Fig. 3, E and F**). These data demonstrated that substantial growth

201 inhibition of *Ec-C* was required to observe transformants above the detection limit. Inhibition of  
202 *Ec-C* growth in the presence of high IPTG concentrations enhanced both eDNA concentration  
203 and *B. subtilis* abundance, suggesting that both of these factors were critical for efficient  
204 chromosomal transfer (**Fig. 3 (E and F) and fig. S4B**).

205 To further test the predictions of the models, we varied both the initial proportion and total  
206 density of *B. subtilis* and *Ec-P* or *Ec-C* in the co-cultures and measured transformation frequency  
207 at 6 hr. Our model captured the trends across the different conditions for the *Ec-P* co-culture,  
208 including an enhanced number of *B. subtilis* transformants in conditions with high initial species  
209 densities (**fig. S5A**). The measured transformation frequency for the *Ec-C* co-culture was below  
210 the level of detection across the majority of conditions, reflecting the model prediction of a low  
211 number of *B. subtilis* transformants across all conditions (**fig. S5B**). In sum, our model accurately  
212 forecasted the differential roles of donor cell lysis rates in the *Ec-P* and *Ec-C* co-cultures, as well  
213 as the effects of initial species densities on HGT efficiency.

214 The eDNA release rates ( $\gamma_e$  and  $\lambda_{d1}$ ) are larger for *Ec-P* than *Ec-C*, suggesting that *E. coli*  
215 lysis is enhanced in the presence of the plasmid (**Fig. 3A and table S1**). To test this prediction,  
216 we varied the degree of plasmid-mediated metabolic burden by introducing a set of plasmids with  
217 different copy numbers and sizes into *Ec-C* (**Fig. 3G**). Corroborating the plasmid metabolic burden  
218 effect, the *E. coli* doubling time was correlated with the predicted number of plasmid DNA base  
219 pairs per cell (**fig. S6**). The extracellular chromosome concentration increased with plasmid  
220 metabolic burden and the donor strains harboring pSC101\* and ColE1 exhibited a higher lysis  
221 rate in the presence of *B. subtilis* compared to monoculture (**Fig. 3G**). Notably, transformants  
222 were not observed in the presence of any of the *Ec-C* donor strains except the strain harboring  
223 the plasmid with the highest metabolic cost (pBB275), demonstrating that plasmid metabolic  
224 burden could substantially enhance the efficiency of chromosomal HGT in microbial communities  
225 (**Fig. 3H**). In sum, the abundance of the recipient, lysis rate of the donor and plasmid metabolic  
226 burden enhanced the efficiency of chromosomal transfer in the synthetic microbial community.

227

### 228 **Impact of antibiotics that selectively target donor growth on horizontal gene transfer**

229 Antibiotics have been shown to impact the frequencies of HGT via induction of conjugation and  
230 competence pathways (30–32). To investigate how antibiotics impact gene transfer dynamics in  
231 the synthetic community, we quantified the temporal change in eDNA release, absolute species  
232 abundance and HGT efficiency in the co-culture in response to the antibiotics streptomycin  
233 (bactericidal) or chloramphenicol (bacteriostatic). We used sub-lethal antibiotic concentrations for  
234 *B. subtilis* to study how selective inhibition of the donor growth rate impacts HGT efficiency (**fig.**  
235 **S7**). In response to streptomycin, the growth of *Ec-P* and *Ec-C* were impaired, whereas the growth  
236 of *B. subtilis* was enhanced compared to the no antibiotic control, consistent with an attenuation  
237 of the inhibitory interaction impacting *B. subtilis* (**Figs. 3A, 4 (A, B, E, and F), and table S1**). The  
238 eDNA concentration was higher in the *Ec-P* and *Ec-C* co-cultures in the presence of streptomycin,  
239 indicating that streptomycin enhanced the lysis rate of *E. coli* (**Fig. 4, C and G**). Although the  
240 concentration of eDNA was augmented in the presence of streptomycin, the transformation  
241 frequency in the *Ec-P* co-culture was significantly reduced compared to the no antibiotic control  
242 (**Fig. 4D**), corroborating the key role of *Ec-P* abundance on HGT efficiency (**Fig. 3, C and D**). By  
243 contrast, the transformation frequency in the *Ec-C* co-culture in the presence of streptomycin was  
244 enhanced compared to the no antibiotic condition, consistent the major contribution of the  
245 abundance of the recipient to chromosomal transfer (**Figs. 3E and 4H**). In the presence of  
246 streptomycin, *Ec-P* failed to grow in the community, whereas *Ec-C* persisted over time, indicating  
247 that plasmid metabolic burden not only reduced *E. coli* growth and enhanced lysis, but also  
248 magnified antibiotic sensitivity (**Figs. 4, A and E**).

249 Exposure to sub-lethal concentration of chloramphenicol had opposing effects on the  
250 plasmid and chromosomal temporal release profiles, while consistently reducing the growth rate  
251 of *E. coli* (**Fig. 4, A, C, E, and G**). These temporal trends are consistent with the differential impact

252 of sub-lethal chloramphenicol concentrations on the stringent response, which leads to enhanced  
253 replication of plasmids regulated by relaxed control while inhibiting chromosomal replication (33).  
254 The presence of chloramphenicol had differential impacts on HGT efficiency in the *Ec-C* or *Ec-P*  
255 co-cultures by enhancing or not altering gene transfer, respectively (**Fig. 4, D and H**). In sum, our  
256 results showed that both the cold-shock antibiotic streptomycin or heat-shock antibiotic  
257 chloramphenicol consistently enhanced chromosome transfer even though the rate of eDNA  
258 release exhibited opposing temporal responses (higher and lower donor lysis rate in the presence  
259 of streptomycin or chloramphenicol, respectively than the no antibiotic condition) (**Fig. 4H**) (34).  
260 However, streptomycin and chloramphenicol exhibited differential effects on plasmid gene  
261 transfer by either reducing or not altering HGT efficiency (**Fig. 4D**). Therefore, the mechanism of  
262 action of the antibiotic combined with the origin of the transferred DNA molecule dictated the role  
263 of the antibiotic on inter-species gene transfer in the synthetic community.

264

### 265 **Investigating key molecular and ecological factors shaping gene transfer**

266 We next sought to understand the relationships between different measured variables of the  
267 system across all experiments to provide insight into the factors shaping inter-species plasmid or  
268 chromosome gene transfer. The abundance of *Ec-C* and *B. subtilis* were negatively correlated,  
269 consistent with the inferred negative inter-species interaction  $\alpha_{be}$  of *E* on the growth rate of *B* in  
270 the *Ec-C* model (**Fig. 3A, fig. S8A, and table S1**). The plasmid transfer frequency was positively  
271 correlated with *E. coli* abundance (Pearson correlation coefficient  $r = 0.78$ ,  $p$ -value =  $9.37e-7$ ),  
272 consistent with our model's prediction (**Fig. 5 (A and B)**). By contrast, the *Ec-C* abundance was  
273 not correlated to transformation frequency, mirroring the model prediction (**Fig. 5, C and D**).  
274 Indeed, the efficiency of plasmid transfer was maximized for high *E. coli* abundance, whereas  
275 chromosome transfer displayed the opposite relationship with *E. coli* abundance and required  
276 strong inhibition of *E. coli* growth to observe transformants (**Fig. 5, E and G**). The Pearson  
277 correlations between plasmid or chromosome eDNA concentration and transformation frequency  
278 were not statistically significant, suggesting that eDNA was not limiting for HGT in these conditions  
279 (**fig. S8, B and C**).

280 Inhibition of *E. coli* growth by antibiotic stress and programmed cell lysis resulted in an  
281 increase in *B. subtilis* abundance by weakening the strong negative interaction impacting *B.*  
282 *subtilis* (**Figs. 3 (C and E) and 4 (B and F)**). The abundance of *Ec-P* or *Ec-C* and the product of  
283 *B. subtilis* abundance and time-lagged eDNA concentration were negatively correlated (Pearson  
284 correlation coefficient  $r = -0.61$ ,  $p$ -value =  $0.00163$  for plasmid and  $r = -0.89$ ,  $p$ -value =  $2.94e-11$   
285 for chromosome) (**Fig. 5, E and G**), reflecting the trend in the models (**Fig. 5, F and H**). The  
286 strongest negative correlation between *E. coli* abundance and chromosome eDNA concentration  
287 occurred for eDNA concentration measured four hours earlier, suggesting a time delay between  
288 cell death and eDNA release (**fig. S8D**). In sum, our results demonstrate that the abundance of  
289 the *E. coli* donor was a key determinant of efficient plasmid transfer. However, our data suggests  
290 efficient chromosome transfer required both sufficient eDNA concentration and *B. subtilis*  
291 abundance in the community (**Fig. 5G**). Therefore, our results suggest the strong negative  
292 interaction from *Ec-C* to *B. subtilis* is the major factor that impeded chromosomal HGT in the  
293 synthetic community and thus environmental perturbations that alleviated microbial competition  
294 and increased donor cell lysis rates substantially enhanced chromosomal transfer.

295

296

### 297 **DISCUSSION**

298 The intracellular network and environmental signals that control the expression of the natural  
299 competence pathway in *B. subtilis* in monoculture conditions have been extensively characterized  
300 (35, 36). The current paradigm for gene transfer via natural competence in *B. subtilis* is that the  
301 recipient drives control of this process by activating competence gene expression in a fraction of  
302 the population in response to specific environmental signals (37). However, *B. subtilis* has evolved

303 in diverse microbial communities shaped by a complex and dynamic web of abiotic and biotic  
304 interactions that impact the rates of HGT (10). Reduced complexity consortia composed of  
305 genetically manipulable species allow precise control of environmental, ecological and  
306 intracellular network factors and are thus powerful systems to dissect the variables shaping the  
307 rate of HGT.

308 Using a detailed and quantitative analysis of a synthetic microbial community, our results  
309 challenge the current paradigm of recipient driven control of gene transfer via natural competence  
310 by demonstrating that the donor strain *E. coli* was a major driver of plasmid transfer as opposed  
311 to the concentration of eDNA (14). Notably, efficient chromosomal HGT required strong growth  
312 inhibition of the donor, which in turn increased the abundance of *B. subtilis* by impairing the  
313 strength of microbial competition and eDNA concentration. Therefore, our results demonstrate  
314 that the source of the transferred DNA determined the effect of the donor strain on the rates of  
315 HGT in the community. The emergence of antibiotic resistance pathogens via HGT has  
316 accelerated in recent years and is an imminent threat to global public health (6). Selective  
317 targeting of donor strains harboring antibiotic resistance genes has been proposed as a strategy  
318 to reduce the propagation of these genes through microbial communities (38, 39). However, our  
319 results indicate that altering the abundance and lysis rates of donor strains could either potentiate  
320 or reduce the rate of HGT via natural competence depending on whether the antibiotic resistance  
321 genes are derived from plasmid or chromosome origin.

322 Specific antibiotics have been shown to induce competence gene expression or enhance  
323 transformation frequencies in *S. pneumoniae*, *Legionella pneumophila* and *B. subtilis*  
324 monocultures due to activation of stress responses or variation in gene copy numbers (14, 31, 32,  
325 40). However, the effect of an antibiotic on the efficiency of gene transfer depends on both the  
326 specific mechanism of action and the effective concentration. Using the synthetic community, we  
327 found that the bactericidal antibiotic streptomycin substantially reduced inter-species plasmid  
328 transfer, whereas the bacteriostatic antibiotic chloramphenicol did not impact the efficiency of this  
329 process. By contrast, both antibiotics enhanced inter-species transfer of the chromosomal derived  
330 genes. Therefore, in a microbial community context, antibiotic stress could either diminish or  
331 enhance inter-species gene transfer, which has implications for the design of antibiotic treatments.  
332 Taken together, these results demonstrate that the plasmid or chromosome origin of transferred  
333 DNA sequences is a major determinant of the impact of antibiotic stress on gene transfer due to  
334 potential differences in the molecular mechanisms of HGT. Based on these results, the use of  
335 selective chemical inhibitors that target natural competence activities in the recipient and growth  
336 of the donor strain could be a promising strategy to reduce the rate of horizontal gene transfer of  
337 plasmid derived genes in microbial communities (41). By contrast, the rate of HGT of  
338 chromosomal derived genes could be reduced by exploiting microbial competition to exclude the  
339 recipient while promoting the growth of the donor.

340 Our results demonstrated that spatial proximity of *E. coli* and *B. subtilis* substantially  
341 enhanced plasmid transfer. Consistent with this result, cell-to-cell contact and spatial proximity  
342 have been shown to play an important role in inter-species and intra-strain gene transfer via  
343 natural competence in several other microbial communities (11, 12, 14, 17). The molecular  
344 mechanisms driving these physical associations are not understood, with the exception of gene  
345 transfer mediated by the contact-dependent type VI secretion system (T6SS). *E. coli* has been  
346 shown to self-aggregate and adhere to different species including yeast and mammalian cells  
347 (42–44), suggesting that this property could influence HGT efficiency in the synthetic community.  
348 Future work could investigate the molecular mechanisms and genetic determinants of cell-to-cell  
349 contact in the HGT process via natural competence in microbial communities.

350 We showed that plasmid metabolic burden reduced the growth rate of the donor and  
351 enhanced cell lysis, leading to an increase in the rate of eDNA release and chromosomal HGT.  
352 Future work will investigate if plasmid metabolic burden leads to higher lysis and gene transfer  
353 efficiencies across diverse bacterial species. If this phenomenon is generalizable to other species,



354 the frequency of transferring genetic information encoded on the chromosome to other species  
355 via natural competence may be higher for strains that harbor metabolically costly plasmids.  
356 Therefore, prediction of potential hub donor species in HGT networks could leverage  
357 metagenomics linking plasmids to host genomes (45). In addition, the effect of plasmid metabolic  
358 burden on cell lysis presents potential challenges for biocontainment of engineered DNA  
359 sequences in the environment (46).

360 The reduced complexity of the synthetic community enabled a detailed and quantitative  
361 investigation of molecular and ecological factors influencing gene transfer dynamics. However,  
362 this community does not capture the taxonomic diversity of natural microbiomes. In natural  
363 communities, the donor and/or recipient taxa are largely unknown as well as the effects of  
364 environmental perturbations such as antibiotic stress on HGT events. Horizontal gene transfer  
365 events can be identified in natural communities *in situ* via time-series analysis of strain-level  
366 genome sequences using high-throughput chromosomal confirmation capture (Hi-C) (47). Future  
367 work could couple such multiplexed measurements of HGT within microbiomes with network  
368 inference techniques to decipher the complex web of interactions between abiotic and biotic  
369 factors that drive HGT. A deeper and quantitative understanding of the ecological and molecular  
370 factors shaping HGT efficiency could be exploited to design anti-HGT microbiome interventions  
371 to reduce the propagation of antibiotic resistance and virulence genes in microbiomes.

372

## 373 MATERIALS AND METHODS

### 374 *Strain and plasmid construction*

375 The strain background for *Ec-P* and *Ec-C* was *E. coli* MG1655. For flow cytometry analysis, RFP  
376 driven by the  $P_{J23100}$  constitutive promoter was introduced onto the *Ec-P* genome downstream of  
377 *caiE* gene using CRISPR gene editing techniques (48). *Ec-P* was transformed with the plasmid  
378 pBB275 which contains a spectinomycin resistance gene (*specR*) flanked by two 500 bp *ycgO*  
379 sequences homologous to the *B. subtilis* PY79 genome. To construct *Ec-C*, an erythromycin  
380 resistance gene (*ermR*) and GFP driven by the  $P_{veg}$  constitutive promoter flanked by two 500 bp  
381 *yvbJ* sequences homologous to *B. subtilis* PY79 were integrated onto the *E. coli* genome  
382 (downstream of *caiE* gene). For programmable *E. coli* lysis, the plasmid pYC01 harboring the  
383  $\phi X174$  lysis gene *E* driven by an IPTG-inducible promoter was used to control the donor lysis rate.  
384 The plasmid pYC01 was constructed from pCSaE500 (Addgene #53182) by replacing the lysis  
385 gene promoter with  $P_{A1lacO-1}$  promoter (49). To characterize plasmid metabolic burden, ColE1  
386 (pBbE2k-RFP), p15A (pBbA2a-RFP), and pSC101\* (pBbS2c-RFP) were derived from the  
387 BglBrick library were individually transformed into *Ec-C* using standard chemical transformation  
388 techniques (50). To increase the transformation efficiency of *B. subtilis* PY79 in LB medium, a  
389 xylose-inducible *comK* was integrated into *amyE* locus (27). To monitor the competence activity,  
390  $P_{comK-gfp}$  was introduced into *lacA* locus. To image the *B. subtilis* under microscope,  $P_{hyperspank-}$   
391 *gfp* (51) was integrated into *lacA* locus. All DNA oligos used for cloning were synthesized by  
392 Integrated DNA Technologies (IDT). The list of plasmids and strains used in this study can be  
393 found in **table S3**. The estimated copy numbers per cell for pSC101\*, p15A, ColE1 and pBB275  
394 were 3-4, 20-30, 50-70 and 50-70, respectively (49). The plasmid pBB275 was ~1.5 kb larger in  
395 size than ColE1 and shared the same origin of replication. To normalize for differences in DNA  
396 copy numbers, the eDNA copy number was calculated by NEBioCalculator with pBB275 size  
397 4927 bp and *E. coli* MG1655 genome size 4639675 bp.

398

### 399 *Bacterial culturing experiments*

400 For bacterial culturing experiments, cells were first inoculated from a -80°C glycerol stock into 4  
401 mL Lennox LB media (Sigma-Aldrich) containing antibiotics for selection and cultured at 37°C for  
402 12 hours. The OD600 was measured by NanoDrop One (Thermo Fisher Scientific) and the cells  
403 were diluted to an OD600 of 0.1 in 10 mL LB supplemented with 50 mM xylose (Thermo Fisher

404 Scientific) in 14 mL Falcon™ Round-Bottom Tubes (Thermo Fisher Scientific) and cultured at  
405 37°C with shaking. For the *B. subtilis* monoculture experiments, the media was supplemented  
406 with 100 ng mL<sup>-1</sup> purified *E. coli* plasmid or genomic DNA. Plasmid and genomic DNA were  
407 purified using a Plasmid Miniprep Kit (Qiagen) and DNeasy Blood & Tissue Kit (Qiagen). Samples  
408 were collected every two hours for measuring colony forming units (CFU), extracellular DNA, and  
409 flow cytometry. CFU measurements were performed by diluting the cell culture into phosphate-  
410 buffered saline (PBS) buffer (Sigma-Aldrich) and plating onto LB agar plates containing 100 µg  
411 mL<sup>-1</sup> spectinomycin (GoldBio) for *Ec-P* or 1 µg mL<sup>-1</sup> erythromycin (Sigma-Aldrich) and 25 µg/mL  
412 lincomycin (VWR) for *Ec-C*. In the *Ec-P* co-culture, *B. subtilis* were selected for on LB agar plates  
413 containing 5 µg mL<sup>-1</sup> chloramphenicol (Sigma-Aldrich), 1 µg mL<sup>-1</sup> erythromycin, and 25 µg mL<sup>-1</sup>  
414 lincomycin. In the *Ec-C* co-culture, *B. subtilis* were selected for on LB agar plates containing 5 µg  
415 mL<sup>-1</sup> chloramphenicol and 10 µg mL<sup>-1</sup> kanamycin (Sigma-Aldrich). *B. subtilis* transformed with  
416 plasmid pBB275 was selected on LB agar plates containing 5 µg mL<sup>-1</sup> chloramphenicol, 1 µg mL<sup>-1</sup>  
417 erythromycin, 25 µg mL<sup>-1</sup> lincomycin, and 100 µg mL<sup>-1</sup> spectinomycin. *B. subtilis* transformed  
418 with *Ec-C* chromosomal DNA was selected on LB agar plates containing 5 µg mL<sup>-1</sup>  
419 chloramphenicol, 10 µg/mL kanamycin, 1 µg mL<sup>-1</sup> erythromycin, and 25 µg mL<sup>-1</sup> lincomycin. Agar  
420 plates were incubated at 37°C overnight and colonies were counted after 24 hours.  
421 Transformation frequency was defined as the ratio of the number of *B. subtilis* CFU per mL to the  
422 total number of *B. subtilis* CFU per mL. The detection limit of transformants was 1 CFU mL<sup>-1</sup>  
423 transformed *B. subtilis* divided by the total *B. subtilis* CFU mL<sup>-1</sup>.

424 To test if the horizontal gene transfer occurred via natural transformation, 2 units mL<sup>-1</sup>  
425 DNase I (Thermo Fisher Scientific) was added to the culture. According to the manufacturer, the  
426 quantity of 1 unit of DNase I can degrades 1 µg of plasmid DNA in 10 min at 37°C. Therefore, we  
427 assumed that 2 units mL<sup>-1</sup> DNase I can fully degrade 100 ng mL<sup>-1</sup> plasmid administered to the *B.*  
428 *subtilis* monoculture and extracellular plasmid released in co-culture the with *Ec-P*.

429

#### 430 *Quantitative real-time PCR measurements of extracellular DNA*

431 To quantify eDNA in the cell culture, an aliquot of the cell culture was centrifuged at 5000xg for 5  
432 min and the supernatant was filtered using a 0.2 µm Whatman Puradisc Polyethersulfone Syringe  
433 Filter (GE Healthcare). To measure eDNA concentration by qPCR, the filtered supernatant was  
434 added to a PCR reaction containing the SsoAdvanced™ Universal Probes Supermix (Bio-Rad)  
435 and TaqMan primers with probes 5'FAM/ZEN/3'IABkFQ (Integrated DNA Technologies). The  
436 TaqMan primers were designed to amplify a 129bp region of the *specR* gene on the plasmid  
437 pBB275 in *Ec-P*, and a 145bp region of the *ermR* on the *Ec-C* genome. The plasmid and genomic  
438 DNA standards were prepared as follows: plasmid was purified from *E. coli* DH5α using the  
439 Plasmid Miniprep Kit (Qiagen) and genomic DNA was extracted from *Ec-C* using DNeasy Blood  
440 & Tissue Kit (Qiagen). The extracted DNA was quantified by Quant-iT dsDNA Assay Kit (Thermo  
441 Fisher Scientific) and then serially diluted to span a broad range of concentrations. The qPCR  
442 reactions were run on the CFX Connect Real-Time PCR Detection System (Bio-Rad). The eDNA  
443 concentrations were determined by interpolating the standard curve mapping DNA concentration  
444 to Cq values.

445

#### 446 *Flow cytometer measurements of B. subtilis competence activity*

447 To characterize competence activity in *B. subtilis*, a modified *B. subtilis* PY79 strain harboring  
448 P<sub>comK</sub>-*gfp* was co-cultured with *Ec-P* constitutively expressing RFP driven by a P<sub>J23100</sub> promoter.  
449 Fluorescence was measured on a LSRFortessa X-20 Flow Cytometer (BD Biosciences). A blue  
450 (488 nm) laser was used to quantify GFP and emission was detected using a 530/30 nm filter and  
451 a yellow-green (561 nm) laser was used to excite RFP and emission was detected using a 610/20  
452 nm filter. The GFP and RFP fluorescence distribution was displayed using the FlowJo software.  
453 The RFP-OFF and RFP-ON cells were separated at 0 hr, but they merged after 2 hours (**fig. S3B**).

454 To quantify the fraction of GFP-ON cells, a threshold in GFP (5000 au) was selected to separate  
455 the OFF and ON states of the bimodal fluorescence distribution of the *B. subtilis* monoculture  
456 in the presence of 50 mM xylose and 100 ng mL<sup>-1</sup> purified plasmid DNA (**fig. S3A**) (52).  
457 However, the choice of the threshold does not affect the qualitative trend between monoculture  
458 and co-culture conditions. Data analysis was performed using custom MATLAB scripts.

#### 459 *Plate reader measurement of bacterial growth with antibiotics*

461 To determine the sub-lethal concentration for *B. subtilis* and effect on *E. coli* growth, the overnight  
462 culture of *Ec-P* and *B. subtilis* (with chloramphenicol resistance gene) was diluted to OD600 equal  
463 to 0.1 in LB media with different concentrations of streptomycin (Sigma-Aldrich) or  
464 chloramphenicol (Sigma-Aldrich). The cell cultures were incubated in a 96-well plate (VWR,  
465 Catalog Number 82050-744) with shaking and sealed with the Breathe-Easy Adhesive Microplate  
466 Seals (Thermo Fisher Scientific) in a TECAN Spark 10M Multimode Microplate Reader and  
467 OD600 measurements were performed every five minutes.

#### 468 *Transwell experiment*

470 To test if spatial proximity between donor and recipient enhances plasmid-mediated gene transfer,  
471 cells were grown in 6-well Nunc Cell Culture Plate (Thermo Fisher Scientific). *Ec-P* and *B. subtilis*  
472 or 100 ng mL<sup>-1</sup> purified plasmid DNA (pBB275) and *B. subtilis* were separated by a 0.4 μm filter.  
473 The plate was sealed with Breathe-Easy Adhesive Microplate Seals (Thermo Fisher Scientific)  
474 and shaken incubated at 37°C with shaking. After 6 hr, samples from the two compartments  
475 separated by the filter were plated on LB agar plates containing the appropriate antibiotics and  
476 colonies were counted after 24 hr incubation at 37°C. Our controls showed that 0.01% of *E. coli*  
477 were observed in the *B. subtilis* compartment at 6 hr, demonstrating that the filter functioned as a  
478 physical barrier to cell diffusion between compartments.

#### 479 *Fluorescent microscopy imaging of bacteria*

481 To image fluorescently labeled *E. coli* and *B. subtilis* in the co-culture, 4 μL of the cell cultures  
482 were transferred to the glass slide after 3 hr incubation with shaking at 3hr at 37°C. To immobilize  
483 the cells for imaging, 5 μL of 0.1 % (w/v) Poly-L-lysine (Millipore Sigma) was spread evenly on  
484 the glass slide. Pipetting of the cultures was minimized to prevent the disruption of the physically  
485 associated cells. Single cells were imaged by Nikon Eclipse Ti Microscope with 40X magnification.  
486 Fluorescence was imaged using the following filters (Chroma): GFP: 470 nm/40 nm (ex),  
487 525/50 nm (em) or RFP: 560 nm/40 nm (ex), 630/70 nm (em). GFP, RFP, and phase-contrast  
488 images were taken from multiple spots on the glass slide. At least 1000 *B. subtilis* and *E. coli* cells  
489 from multiple images were counted by ilastik (53) to quantify the degree of spatial proximity within  
490 regions of interest (ROI).

#### 491 *Statistical analysis*

493 We used an unpaired *t*-test to determine if there is a significant difference between the means of  
494 two groups in **Figure 2J, 3C, and fig. S3C**. We used a Mann-Whitney U Test to determine if two  
495 samples are derived from the same population in **fig. S2D**. Statistically different groups are  
496 denoted by \* *p*-value < 0.05, \*\* if *p*-value < 0.01, or \*\*\* if *p*-value < 0.001. The Pearson correlation  
497 coefficient, *p*-value, and least-squares line were calculated to quantify the correlation between  
498 two variables in **Figure 5 (A, C, E, and G)**, the inset in **fig. S6**, and **fig. S8**.

499

## 500 **ACKNOWLEDGEMENTS**

501 We would like to thank Jason Zuke and Zhengyi Chen for the assistance with the experiments,  
502 and Victor Zavala, Joshua Pulsipher, and Ryan Clark for helpful discussions about the

503 computational model. This work was supported by the Defense Advanced Research Projects  
504 Agency (DARPA) Grant HR0011-19-2-0002.

505

### 506 AUTHOR CONTRIBUTIONS

507 Y.Y.C., B.M.B. and O.S.V. conceived the research. Y.Y.C. performed the experiments. O.S.V.,  
508 B.M.B. and Y.Y.C. analyzed the data. O.S.V. and Y.Y.C. wrote the manuscript. Y.Y.C. and O.S.V.  
509 developed the model. J.M.P. constructed the *Ec-C* strain. O.S.V. secured the funding.

510

### 511 COMPETING INTERESTS

512 The authors declare no competing financial interests.

513

### 514 REFERENCES

- 515 1. S. M. Soucy, J. Huang, J. P. Gogarten, Horizontal gene transfer: Building the web of life.  
516 *Nat. Rev. Genet.* **16**, 472–482 (2015).
- 517 2. J. Ropars, R. C. Rodríguez de la Vega, M. López-Villavicencio, J. Gouzy, E. Sallet, É.  
518 Dumas, S. Lacoste, R. Debuchy, J. Dupont, A. Branca, T. Giraud, Adaptive horizontal  
519 gene transfers between multiple cheese-associated fungi. *Curr. Biol.* **25**, 2562–2569  
520 (2015).
- 521 3. M. Clarke, L. Maddera, R. L. Harris, P. M. Silverman, F-pili dynamics by live-cell imaging.  
522 *Proc. Natl. Acad. Sci. U. S. A.* **105**, 17978–17981 (2008).
- 523 4. S. Overballe-Petersen, K. Harms, L. A. A. Orlando, J. V. M. Mayar, S. Rasmussen, T. W.  
524 Dahl, M. T. Rosing, A. M. Poole, T. Sicheritz-Ponten, S. Brunak, S. Inselmann, J. de  
525 Vries, W. Wackernagel, O. G. Pybus, R. Nielsen, P. J. Johnsen, K. M. Nielsen, E.  
526 Willerslev, Bacterial natural transformation by highly fragmented and damaged DNA.  
527 *Proc. Natl. Acad. Sci. U. S. A.* **110**, 19860–19865 (2013).
- 528 5. C. Johnston, B. Martin, G. Fichant, P. Polard, J.-P. Claverys, Bacterial transformation:  
529 distribution, shared mechanisms and divergent control. *Nat. Rev. Microbiol.* **12**, 181–196  
530 (2014).
- 531 6. N. A. Lerminiaux, A. D. S. Cameron, Horizontal transfer of antibiotic resistance genes in  
532 clinical environments. *Can. J. Microbiol.* **65**, 34–44 (2019).
- 533 7. A. Jensen, O. Valdórrsson, N. Frimodt-Møller, S. Hollingshead, M. Kilian, Commensal  
534 *Streptococci* serve as a reservoir for  $\beta$ -lactam resistance genes in *Streptococcus*  
535 *pneumoniae*. *Antimicrob. Agents Chemother.* **59**, 3529–3540 (2015).
- 536 8. J. Sauerbier, P. Maurer, M. Rieger, R. Hakenbeck, *Streptococcus pneumoniae* R6  
537 interspecies transformation: genetic analysis of penicillin resistance determinants and  
538 genome-wide recombination events. *Mol. Microbiol.* **86**, 692–706 (2012).
- 539 9. R. Hakenbeck, T. Grebe, D. Zähler, J. B. Stock,  $\beta$ -lactam resistance in *Streptococcus*  
540 *pneumoniae*: penicillin-binding proteins and non-penicillin-binding proteins. *Mol.*  
541 *Microbiol.* **33**, 673–678 (1999).
- 542 10. P. H. Brito, B. Chevreux, C. R. Serra, G. Schyns, A. O. Henriques, J. B. Pereira-Leal,  
543 Genetic competence drives genome diversity in *Bacillus subtilis*. *Genome Biol. Evol.* **10**,  
544 108–124 (2018).
- 545 11. R. M. Cooper, L. Tsimring, J. Hasty, Inter-species population dynamics enhance  
546 microbial horizontal gene transfer and spread of antibiotic resistance. *Elife.* **6**, e25950  
547 (2017).
- 548 12. S. Borgeaud, L. C. Metzger, T. Scignari, M. Blokesch, The type VI secretion system of  
549 *Vibrio cholerae* fosters horizontal gene transfer. *Science.* **347**, 63–67 (2015).
- 550 13. W.-Y. Wholey, T. J. Kochan, D. N. Storck, S. Dawid, Coordinated bacteriocin expression  
551 and competence in *Streptococcus pneumoniae* contributes to genetic adaptation through  
552 neighbor predation. *PLoS Pathog.* **12**, e1005413 (2016).
- 553 14. X. Zhang, T. Jin, L. Deng, C. Wang, Y. Zhang, X. Chen, Stress-induced, highly efficient,

- 554 donor cell-dependent cell-to-cell natural transformation in *Bacillus subtilis*. *J. Bacteriol.*  
555 **200**, e00267-18 (2018).
- 556 15. G. D. Tribble, T. W. Rigney, D. H. V. Dao, C. T. Wong, J. E. Kerr, B. E. Taylor, S. Pacha,  
557 H. B. Kaplan, Natural competence is a major mechanism for horizontal DNA transfer in  
558 the oral pathogen *Porphyromonas gingivalis*. *MBio.* **3**, e00231-11 (2012).
- 559 16. G. J. Stewart, C. A. Carlson, J. L. Ingraham, Evidence for an active role of donor cells in  
560 natural transformation of *Pseudomonas stutzeri*. *J. Bacteriol.* **156**, 30–35 (1983).
- 561 17. J. H. Paul, J. M. Thurmond, M. E. Frischer, J. P. Cannon, Intergeneric natural plasmid  
562 transformation between *E. coli* and a marine *Vibrio* species. *Mol. Ecol.* **1**, 37–46 (1992).
- 563 18. R. Frame, J. O. Bishop, The number of sex-factors per chromosome in *Escherichia coli*.  
564 *Biochem. J.* **121**, 93–103 (1971).
- 565 19. C. L. Lee, D. S. W. Ow, S. K. W. Oh, Quantitative real-time polymerase chain reaction for  
566 determination of plasmid copy number in bacteria. *J. Microbiol. Methods.* **65**, 258–267  
567 (2006).
- 568 20. D. Mao, Y. Luo, J. Mathieu, Q. Wang, L. Feng, Q. Mu, C. Feng, P. J. J. Alvarez,  
569 Persistence of extracellular DNA in river sediment facilitates antibiotic resistance gene  
570 propagation. *Environ. Sci. Technol.* **48**, 71–78 (2014).
- 571 21. K. Matsui, N. Ishii, Z. Kawabata, Release of extracellular transformable plasmid DNA  
572 from *Escherichia coli* cocultivated with algae. *Appl. Environ. Microbiol.* **69**, 2399–2404  
573 (2003).
- 574 22. M. G. Lorenz, D. Gerjets, W. Wackernagel, Release of transforming plasmid and  
575 chromosomal DNA from two cultured soil bacteria. *Arch. Microbiol.* **156**, 319–326 (1991).
- 576 23. A. L. Ibáñez de Aldecoa, O. Zafra, J. E. González-Pastor, Mechanisms and regulation of  
577 extracellular DNA release and its biological roles in microbial communities. *Front.*  
578 *Microbiol.* **8**, 1390 (2017).
- 579 24. J. C. Diaz Ricci, M. E. Hernández, Plasmid effects on *Escherichia coli* metabolism. *Crit.*  
580 *Rev. Biotechnol.* **20**, 79–108 (2000).
- 581 25. H. Ingmer, C. Miller, S. N. Cohen, The RepA protein of plasmid pSC101 controls  
582 *Escherichia coli* cell division through the SOS response. *Mol. Microbiol.* **42**, 519–526  
583 (2001).
- 584 26. M. E. Patient, D. K. Summers, ColE1 multimer formation triggers inhibition of *Escherichia*  
585 *coli* cell division. *Mol. Microbiol.* **9**, 1089–1095 (1993).
- 586 27. X.-Z. Zhang, Y.-H. P. Zhang, Simple, fast and high-efficiency transformation system for  
587 directed evolution of cellulase in *Bacillus subtilis*. *Microb. Biotechnol.* **4**, 98–105 (2011).
- 588 28. N. Mirouze, Y. Desai, A. Raj, D. Dubnau, Spo0A~P Imposes a Temporal Gate for the  
589 Bimodal Expression of Competence in *Bacillus subtilis*. *PLoS Genet.* **8**, e1002586 (2012).
- 590 29. O. S. Venturelli, A. V Carr, G. Fisher, R. H. Hsu, R. Lau, B. P. Bowen, S. Hromada, T.  
591 Northen, A. P. Arkin, Deciphering microbial interactions in synthetic human gut  
592 microbiome communities. *Mol. Syst. Biol.* **14**, e8157 (2018).
- 593 30. R. T. Jeters, G.-R. Wang, K. Moon, N. B. Shoemaker, A. A. Salyers, Tetracycline-  
594 associated transcriptional regulation of transfer genes of the *Bacteroides* conjugative  
595 transposon CTnDOT. *J. Bacteriol.* **191**, 6374–6382 (2009).
- 596 31. M. Prudhomme, L. Attaiech, G. Sanchez, B. Martin, J.-P. Claverys, Antibiotic stress  
597 induces genetic transformability in the human pathogen *Streptococcus pneumoniae*.  
598 *Science.* **313**, 89–92 (2006).
- 599 32. X. Charpentier, E. Kay, D. Schneider, H. A. Shuman, Antibiotics and UV radiation induce  
600 competence for natural transformation in *Legionella pneumophila*. *J. Bacteriol.* **193**,  
601 1114–1121 (2011).
- 602 33. A. Lim, E. Lee, E. Yip, H. Lam, K. Hui, Effects of the stringent response on pBR322  
603 plasmid copy number in *Escherichia coli* strains. *J. Exp. Microbiol. Immunol.* **9**, 86–91  
604 (2006).

- 605 34. M. Au, J. Ip, I. Tao, M. A. Zhang, Evaluation of stringency elicited by antibiotics on  
606 plasmid copy number of pBR322 per genome in DH5 $\alpha$  *Escherichia coli* cells. *J. Exp.*  
607 *Microbiol. Immunol.* **13**, 83–88 (2009).
- 608 35. R. Rahmer, K. M. Heravi, J. Altenbuchner, Construction of a super-competent *Bacillus*  
609 *subtilis* 168 using the P<sub>mtlA</sub>-comKS inducible cassette. *Front. Microbiol.* **6**, 1431 (2015).
- 610 36. P. Tortosa, L. Logsdon, B. Kraigher, Y. Itoh, I. Mandic-Mulec, D. Dubnau, Specificity and  
611 genetic polymorphism of the *Bacillus* competence quorum-sensing system. *J. Bacteriol.*  
612 **183**, 451–460 (2001).
- 613 37. J.-P. Claverys, M. Prudhomme, B. Martin, Induction of Competence Regulons as a  
614 General Response to Stress in Gram-Positive Bacteria. *Annu. Rev. Microbiol.* **60**, 451-  
615 475 (2006).
- 616 38. R. López-igual, J. Bernal-bayard, A. Rodríguez-patón, J. Ghigo, D. Mazel, Engineered  
617 toxin-intein antimicrobials can selectively target and kill antibiotic-resistant bacteria in  
618 mixed populations. *Nat. Biotechnol.* **37**, 755–760 (2019).
- 619 39. D. Bikard, C. W. Euler, W. Jiang, P. M. Nussenzweig, G. W. Goldberg, X. Duportet, V. A.  
620 Fischetti, L. A. Marraffini, Exploiting CRISPR-Cas nucleases to produce sequence-  
621 specific antimicrobials. *Nat. Biotechnol.* **32**, 1146–1150 (2014).
- 622 40. J. Slager, M. Kjos, L. Attaiech, J.-W. Veening, Antibiotic-induced replication stress  
623 triggers bacterial competence by increasing gene dosage near the origin. *Cell.* **157**, 395–  
624 406 (2014).
- 625 41. A. Domenech, A. R. Brochado, V. Sender, K. Hentrich, B. Henriques-Normark, A. Typas,  
626 J.-W. Veening, Proton motive force disruptors block bacterial competence and horizontal  
627 gene transfer. *Cell Host Microbe.* **27**, 544–555 (2020).
- 628 42. A. K. Møller, M. P. Leatham, T. Conway, P. J. M. Nuijten, L. A. M. de Haan, K. A.  
629 Krogfelt, P. S. Cohen, An *Escherichia coli* MG1655 lipopolysaccharide deep-rough core  
630 mutant grows and survives in mouse cecal mucus but fails to colonize the mouse large  
631 intestine. *Infect. Immun.* **71**, 2142–2152 (2003).
- 632 43. G. P. Dubey, S. Ben-Yehuda, Intercellular nanotubes mediate bacterial communication.  
633 *Cell.* **144**, 590–600 (2011).
- 634 44. K. Jann, G. Schmidt, E. Blumenstock, K. Vosbeck, *Escherichia coli* adhesion to  
635 *Saccharomyces cerevisiae* and mammalian cells: role of piliation and surface  
636 hydrophobicity. *Infect. Immun.* **32**, 484–489 (1981).
- 637 45. Y. Suzuki, S. Nishijima, Y. Furuta, J. Yoshimura, W. Suda, K. Oshima, M. Hattori, S.  
638 Morishita, Long-read metagenomic exploration of extrachromosomal mobile genetic  
639 elements in the human gut. *Microbiome.* **7**, 119 (2019).
- 640 46. T. Blazejewski, H.-I. Ho, H. H. Wang, Synthetic sequence entanglement augments  
641 stability and containment of genetic information in cells. *Science.* **365**, 595–598 (2019).
- 642 47. E. Yaffe, D. A. Relman, Tracking microbial evolution in the human gut using Hi-C reveals  
643 extensive horizontal gene transfer, persistence and adaptation. *Nat. Microbiol.* **5**, 343–  
644 353 (2020).
- 645 48. R. G. Egbert, H. S. Rishi, B. A. Adler, D. M. McCormick, E. Toro, R. T. Gill, A. P. Arkin, A  
646 versatile platform strain for high-fidelity multiplex genome editing. *Nucleic Acids Res.* **47**,  
647 3244–3256 (2019).
- 648 49. R. Lutz, H. Bujard, Independent and tight regulation of transcriptional units in *Escherichia*  
649 *coli* via the LacR/O, the TetR/O and AraC/I1-I2 regulatory elements. *Nucleic Acids Res.*  
650 **25**, 1203–1210 (1997).
- 651 50. T. S. Lee, R. A. Krupa, F. Zhang, M. Hajimorad, W. J. Holtz, N. Prasad, S. K. Lee, J. D.  
652 Keasling, BglBrick vectors and datasheets: A synthetic biology platform for gene  
653 expression. *J. Biol. Eng.* **5**, 12 (2011).
- 654 51. W. Overkamp, K. Beilharz, R. D. O. Weme, A. Solopova, H. Karsens, Á. T. Kovács, J.  
655 Kok, O. P. Kuipers, J.-W. Veening, Benchmarking various green fluorescent protein

- 656 variants in *Bacillus subtilis*, *Streptococcus pneumoniae*, and *Lactococcus lactis* for live  
657 cell imaging. *Appl. Environ. Microbiol.* **79**, 6481–6490 (2013).
- 658 52. B. J. Haijema, J. Hahn, J. Haynes, D. Dubnau, A ComGA-dependent checkpoint limits  
659 growth during the escape from competence. *Mol. Microbiol.* **40**, 52–64 (2001).
- 660 53. S. Berg, D. Kutra, T. Kroeger, C. N. Straehle, B. X. Kausler, C. Haubold, M. Schiegg, J.  
661 Ales, T. Beier, M. Rudy, K. Eren, J. I. Cervantes, B. Xu, F. Beuttenmueller, A. Wolny, C.  
662 Zhang, U. Koethe, F. A. Hamprecht, A. Kreshuk, ilastik: interactive machine learning for  
663 (bio)image analysis. *Nat. Methods.* **16**, 1226–1232 (2019).
- 664 54. O. Fridman, A. Goldberg, I. Ronin, N. Shores, N. Q. Balaban, Optimization of lag time  
665 underlies antibiotic tolerance in evolved bacterial populations. *Nature.* **513**, 418–421  
666 (2014).
- 667
- 668

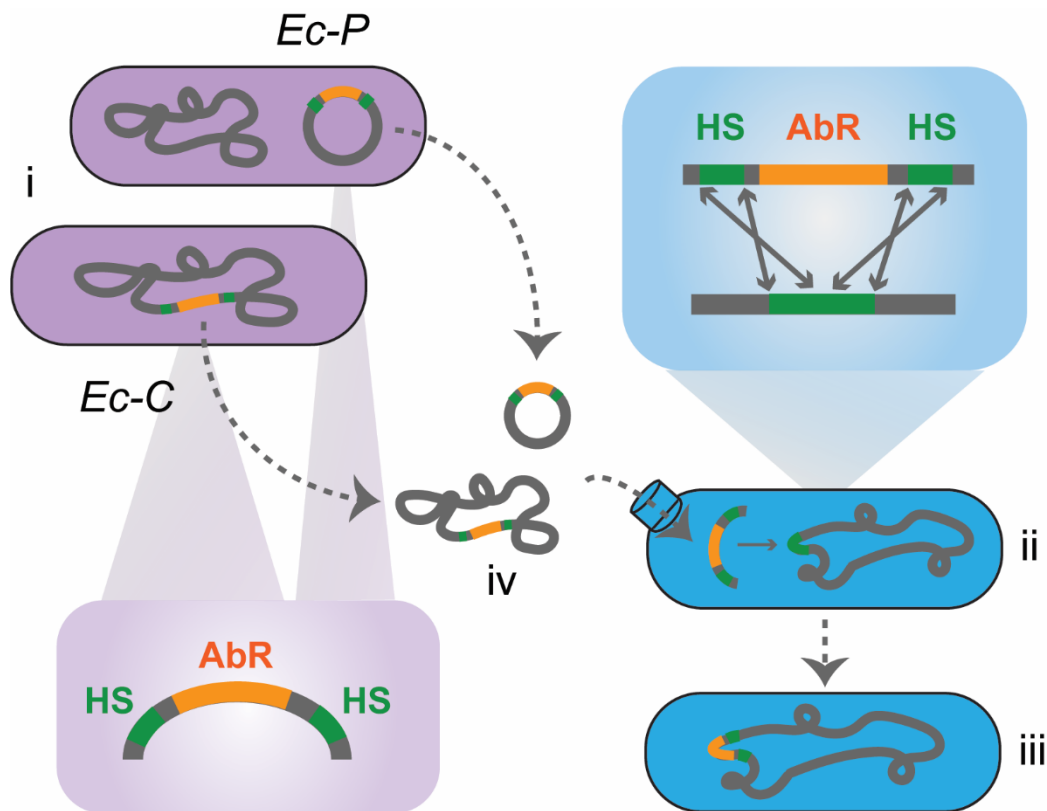

669

670 **Figure 1. Horizontal gene transfer from *E. coli* to *B. subtilis* in the synthetic bacterial**  
671 **consortium.** *E. coli* donor has an integration cassette that is composed of an antibiotic resistance  
672 gene (AbR) flanked by two homologous sequences (HS) of *B. subtilis*. The integration cassette is  
673 either on the plasmid (*Ec-P*) or genome (*Ec-C*). Competent *B. subtilis* can take up DNA and the  
674 AbR can be integrated into *B. subtilis* genome via homologous recombination. To characterize  
675 the gene transfer process, *E. coli* (i), *B. subtilis* (ii), transformed *B. subtilis* (iii), and eDNA (iv) were  
676 measured over time.

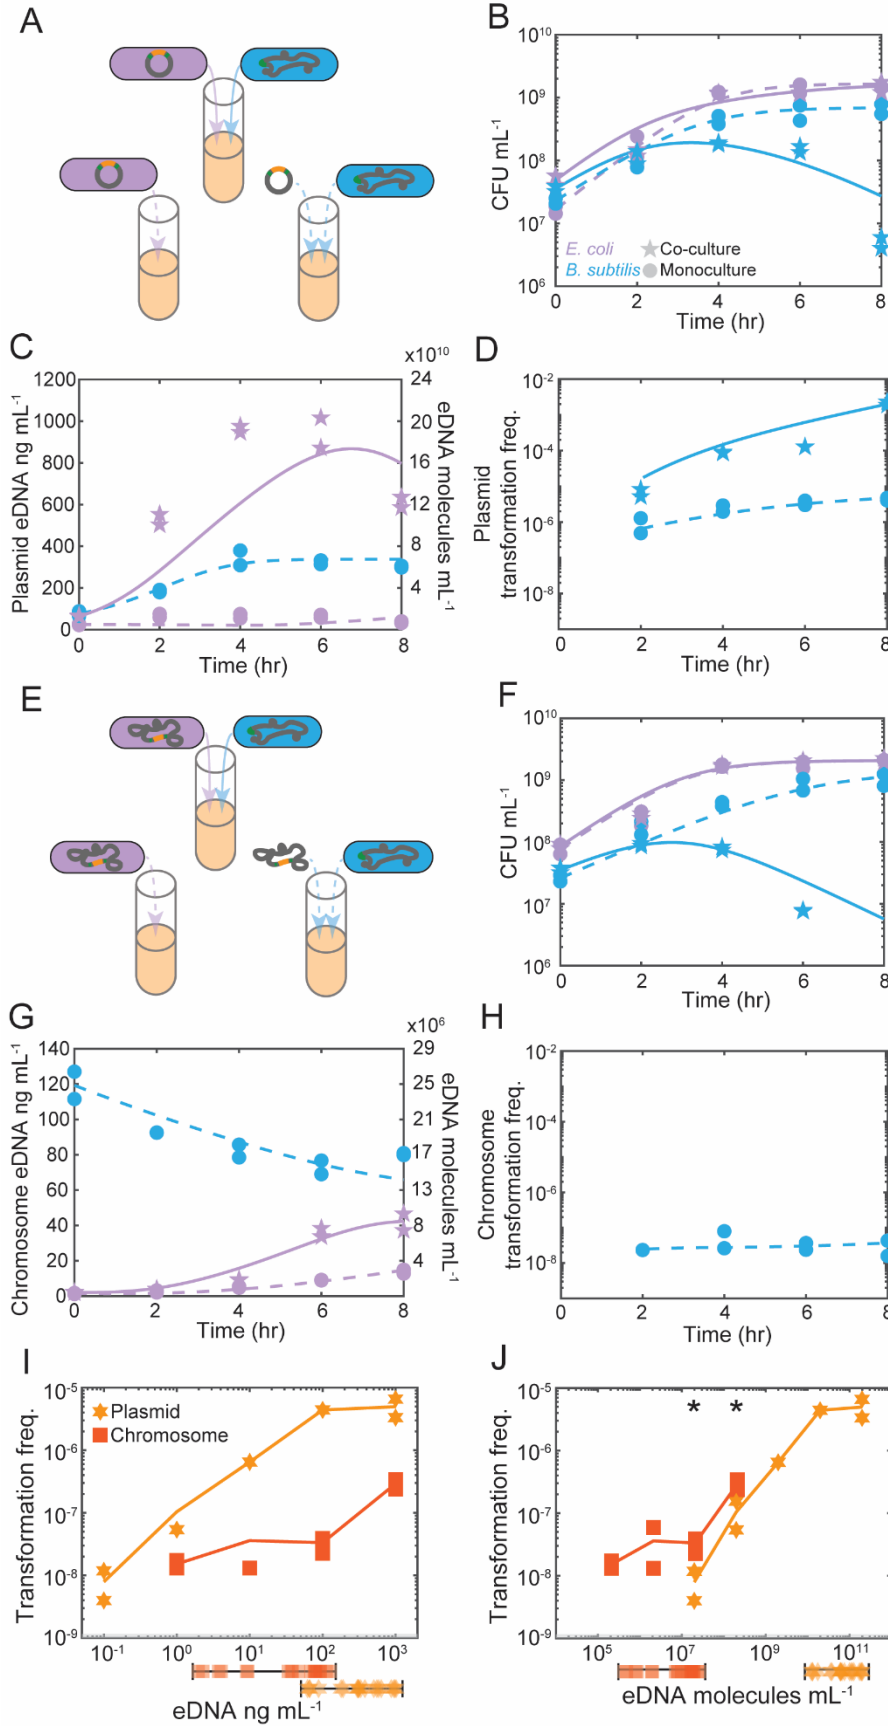



678 **Figure 2. Temporal characterization of gene transfer in the synthetic microbial community.**  
679 **(A)** Schematic of experimental design to characterize the temporal changes in plasmid gene  
680 transfer in the *B. subtilis* (blue) monoculture in the presence of purified plasmid DNA ( $100 \text{ ng mL}^{-1}$ )  
681 or co-culture of *Ec-P* (purple) and *B. subtilis*. Extracellular plasmid release was characterized  
682 in the *Ec-P* monoculture. **(B)** Time-series measurements of *Ec-P* and *B. subtilis* CFU  $\text{mL}^{-1}$  in the  
683 monocultures (dashed) and co-culture (solid). Data points represent experimental measurements  
684 and lines denote model fits to the data. **(C)** Time-series measurements of extracellular plasmid  
685 DNA in the *Ec-P* and *B. subtilis* monocultures (dashed) or co-culture (solid). Data points represent  
686 experimental measurements and lines denote model fits to the data. **(D)** Time-series  
687 measurements of plasmid transformation frequency for the *B. subtilis* monoculture (dashed) in  
688 the presence of purified plasmid DNA  $100 \text{ ng mL}^{-1}$  or co-culture with *Ec-P* (solid). Data points  
689 represent experimental measurements and lines denote model fits to the data. **(E)** Schematic of  
690 experimental design to characterize the temporal changes in chromosomal gene transfer in the  
691 *B. subtilis* (blue) monoculture supplemented with purified genomic *Ec-C* DNA ( $100 \text{ ng mL}^{-1}$ ) or co-  
692 culture of *B. subtilis* and *Ec-C* (purple). **(F)** Time-series measurements of *Ec-C* and *B. subtilis*  
693 CFU  $\text{mL}^{-1}$  in monoculture (dashed) and co-culture (solid). Data points represent experimental  
694 measurements and lines denote model fits to the data. **(G)** Time-series measurements of  
695 extracellular chromosomal DNA in the *Ec-C* and *B. subtilis* monocultures (dashed) and co-culture  
696 (solid). Data points and lines denote experimental measurements and model fits, respectively. **(H)**  
697 Time-series measurements of chromosome transformation frequency in the *B. subtilis*  
698 monoculture supplemented with purified genomic *Ec-C* DNA ( $100 \text{ ng mL}^{-1}$ ) or the co-culture (no  
699 transformants observed). Data points and lines represent experimental measurements and model  
700 fits to the data, respectively. **(I)** Relationship between purified plasmid or chromosome  
701 concentration and transformation frequency in the *B. subtilis* monoculture at 6 hr. Horizontal lines  
702 indicate the range of extracellular plasmid and chromosome concentrations measured in the *B.*  
703 *subtilis* monoculture with purified DNA ( $100 \text{ ng mL}^{-1}$ ) and co-cultures with *Ec-P* or *Ec-C* (**Fig. 2, C**  
704 **and G**). Data points and lines denote experimental measurements experimental measurements  
705 and the average of two biological replicates. **(J)** Relationship between eDNA copy number per  
706 mL of purified plasmid or chromosome and transformation frequency at 6 hr in the *B. subtilis*  
707 monoculture. All conditions were supplemented with 50 mM xylose.

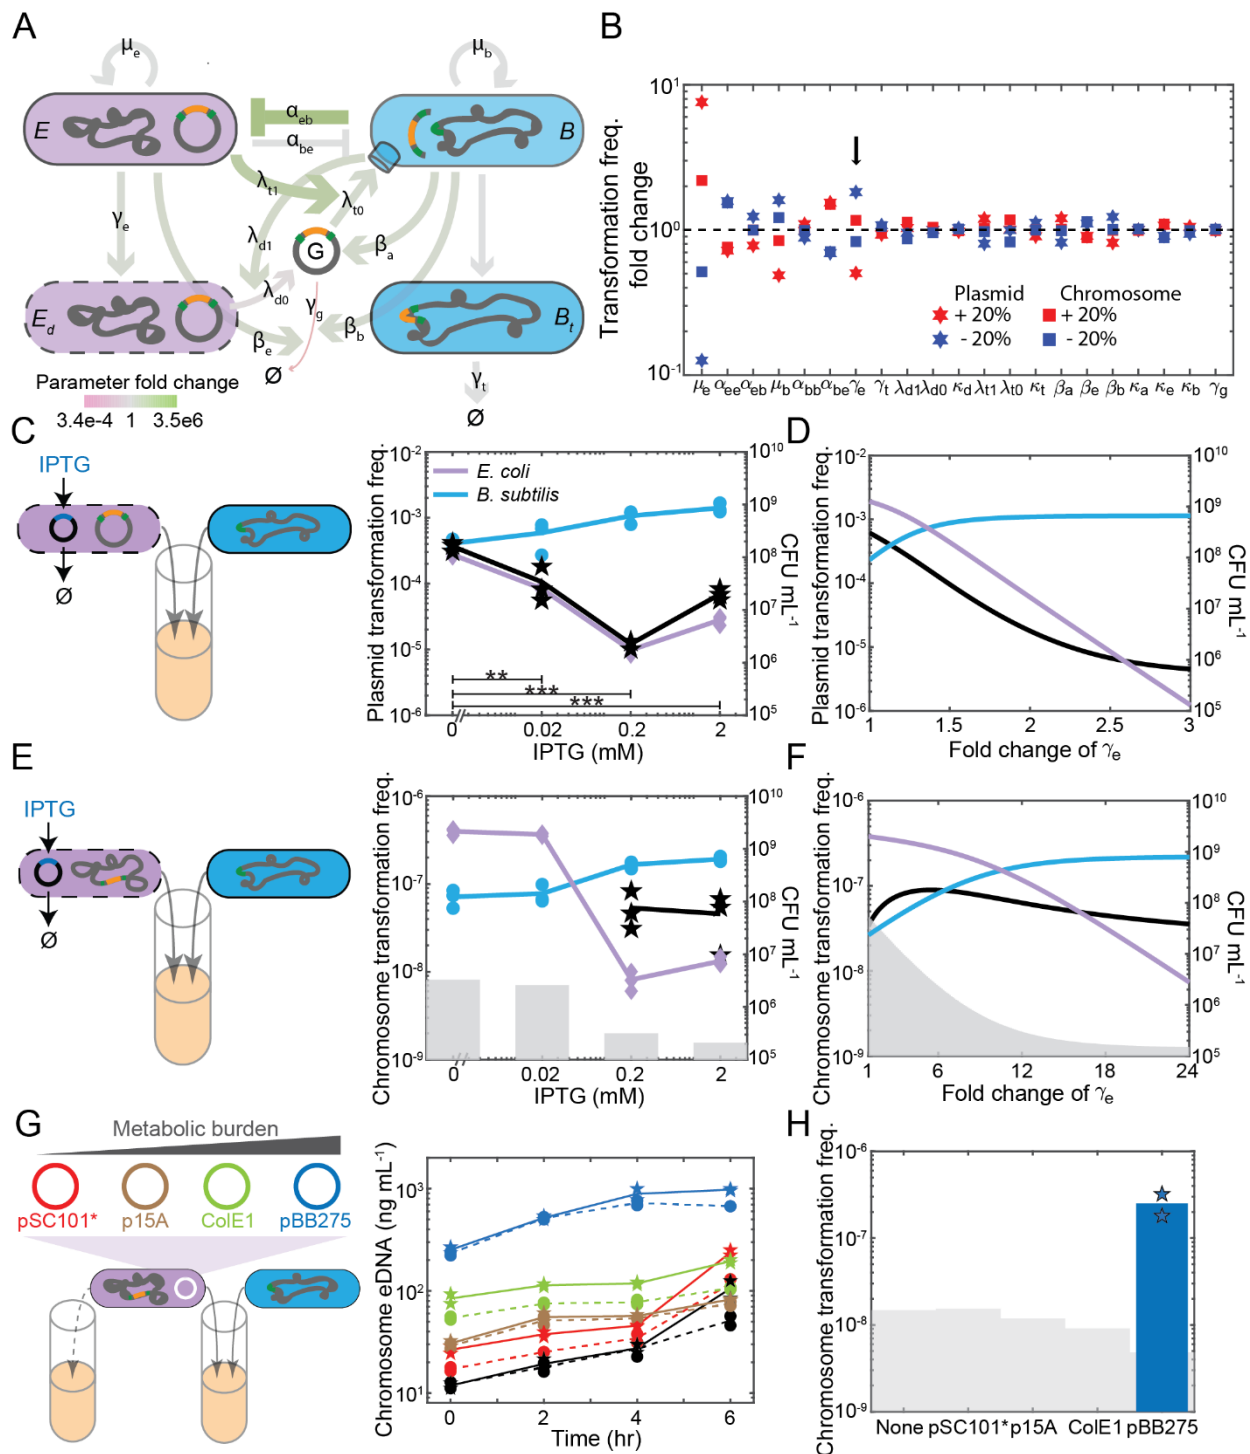

708

709 **Figure 3. Model prediction on the role of donor in plasmid-mediated and chromosome-**  
 710 **mediated gene transfer. (A)** Schematic of the key interactions in the dynamic computational  
 711 model of growth and horizontal gene transfer. The model species include *E. coli* (*E*),  
 712 dead *E. coli* (*E<sub>d</sub>*), *B. subtilis* (*B*), eDNA (*G*), and transformed *B. subtilis* (*B<sub>t</sub>*). The line width and color of each  
 713 edge are proportional to the fold change of each parameter in the plasmid to chromosome model.  
 714 **(B)** Relationship between each parameter and the fold change of the predicted transformation

715 frequency in the plasmid or chromosome model at 6 hr for 20% increase or decrease in the  
716 parameter value compared to the estimated parameter set. **(C)** Schematic of a co-culture  
717 experiment of *Ec-P* harboring an IPTG-inducible lysis gene and *B. subtilis* (left). Relationship  
718 between IPTG concentration and plasmid transformation frequency or CFU mL<sup>-1</sup> (right) at 6 hr in  
719 the co-culture. Transformation frequency exhibited a decreasing trend with IPTG concentration  
720 ( $p$ -value < 0.01 (\*\*)) or  $p$ -value < 0.001 (\*\*\*) using an unpaired  $t$ -test. **(D)** *Ec-P* model prediction of  
721 the concentration (CFU mL<sup>-1</sup>) of *E* and *B*, or plasmid transformation frequency at 6 hr as a function  
722 of the fold change in the *Ec-P* death rate  $\gamma_e$  compared to the estimated parameter value. **(E)**  
723 Schematic of a co-culture experiment of *Ec-C* harboring an IPTG-inducible lysis gene and *B.*  
724 *subtilis* (left). Relationship between IPTG concentration and chromosome transformation  
725 frequency or CFU mL<sup>-1</sup> (right) at 6 hr in the co-culture. Transformants were detected at higher  
726 IPTG concentrations. Shaded regions denote the detection limits for transformation frequency. **(F)**  
727 *Ec-C* model prediction of the concentration (CFU mL<sup>-1</sup>) of *E* and *B*, or chromosome transformation  
728 frequency at 6 hr as a function of the fold change in the *Ec-C* death rate  $\gamma_e$  compared to the  
729 estimated parameter value. We assume that the detection limit of transformants in the model is 1  
730 CFU mL<sup>-1</sup>  $B_t$  divided by the sum of  $B_t$  and  $B$  CFU mL<sup>-1</sup>. **(G)** Schematic of experimental design (left)  
731 of co-cultures composed of *Ec-C* harboring a single plasmid with variable origin of replication and  
732 *B. subtilis* (solid) or *Ec-C* monoculture (dashed). Time-series measurements of extracellular  
733 chromosome concentration in the *Ec-C* monocultures or co-cultures. **(H)** Chromosome  
734 transformation frequency at 4 hr in each co-culture of *Ec-C* harboring different plasmids and *B.*  
735 *subtilis*. Shaded area indicates the transformation frequency detection limit. Lines and bars in **Fig.**  
736 **3, C, E, G, and H** represent the average of 2-3 biological replicates. All conditions were  
737 supplemented with 50 mM xylose.

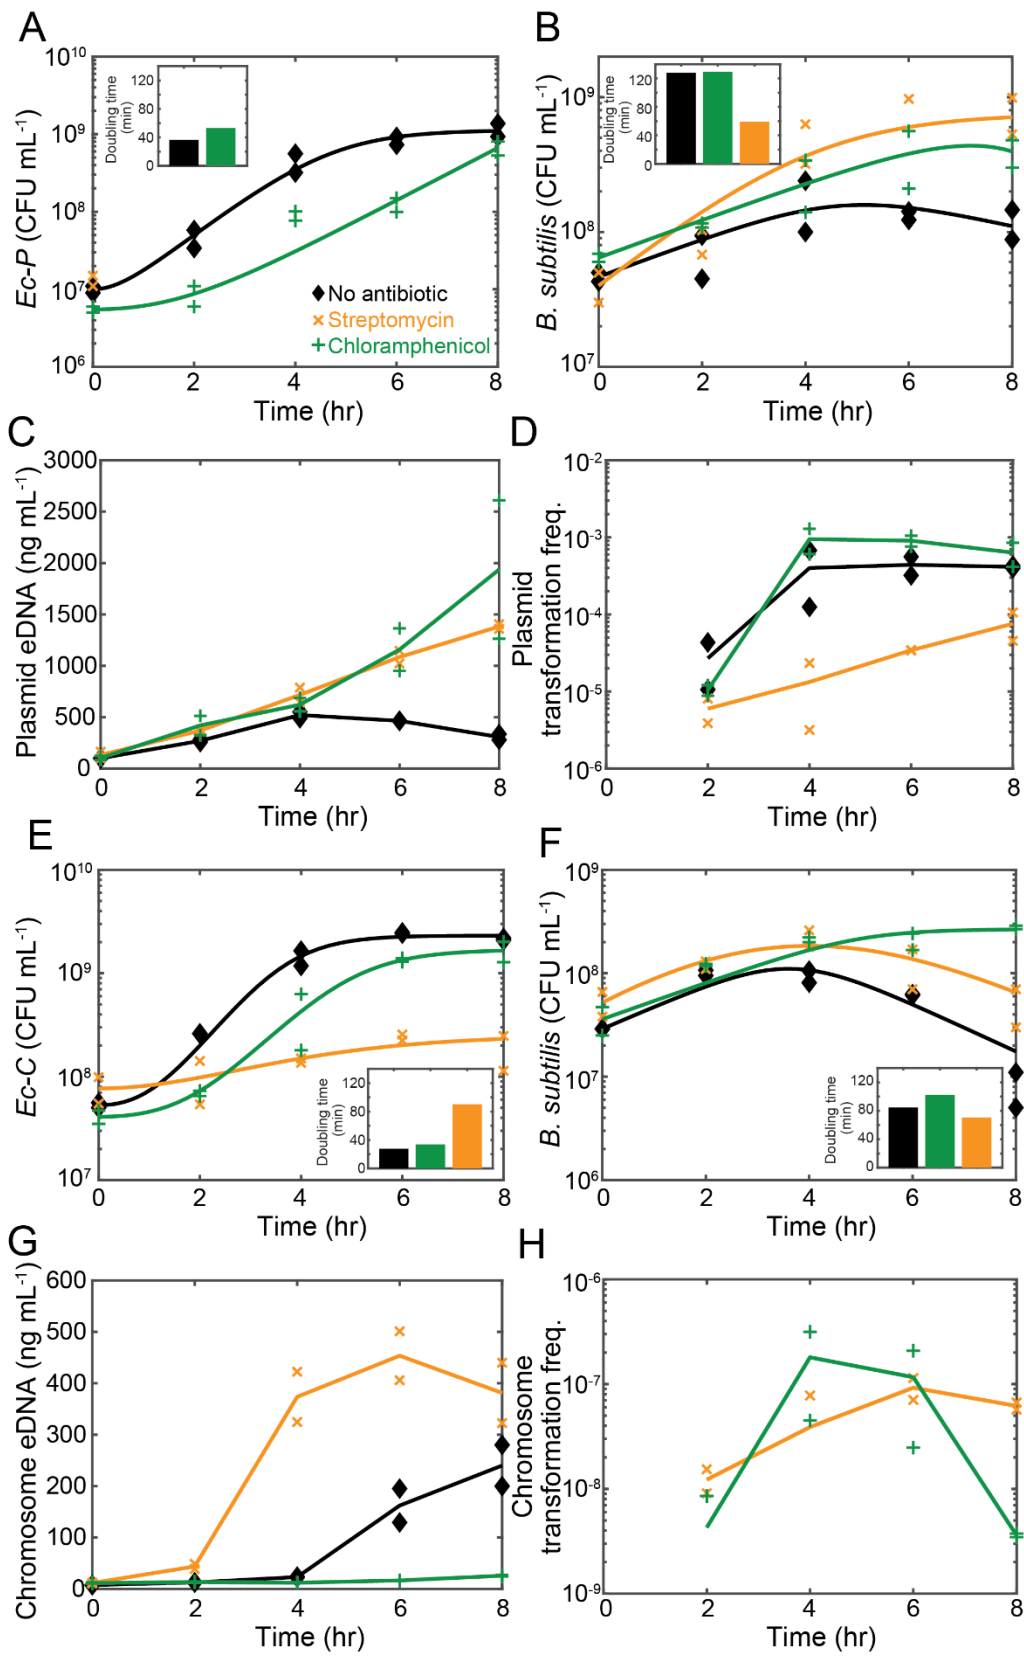

739 **Figure 4. Impact of antibiotics on the dynamics of plasmid and chromosomal gene transfer**  
740 **in the synthetic microbial community. (A)** Time-series measurements of *Ec-P* CFU mL<sup>-1</sup> in co-  
741 culture with *B. subtilis* in the presence of streptomycin (10 µg mL<sup>-1</sup>), chloramphenicol (5 µg mL<sup>-1</sup>)  
742 or no antibiotic. Data points and lines represent experimental measurements and growth model  
743 fits to the data. Inset: Inferred doubling times based on the growth models. **(B)** Time-series  
744 measurements of *B. subtilis* CFU mL<sup>-1</sup> in the co-culture with *Ec-P* in the presence of streptomycin  
745 (10 µg mL<sup>-1</sup>), chloramphenicol (5 µg mL<sup>-1</sup>) or no antibiotic. Data points and lines represent  
746 experimental measurements and growth model fits to the data. Inset: Inferred doubling time based  
747 on the growth models. **(C)** Time-series measurements of extracellular plasmid DNA in the *Ec-P*  
748 and *B. subtilis* co-culture. Data points and lines represent experimental measurements and  
749 averages of biological replicates, respectively. **(D)** Time-series measurements of plasmid  
750 transformation frequency in the *Ec-P* and *B. subtilis* co-cultures. Data points and lines denote  
751 experimental measurements and mean of biological replicates, respectively. **(E)** Time-series  
752 measurements of *Ec-C* CFU mL<sup>-1</sup> in co-culture with *B. subtilis* in the presence of streptomycin (10  
753 µg mL<sup>-1</sup>), chloramphenicol (5 µg mL<sup>-1</sup>) or no antibiotic. Data points and lines represent  
754 experimental measurements and growth model fits to the data. Inset: Inferred doubling times  
755 based on the growth models. **(F)** Time-series measurements of *B. subtilis* CFU mL<sup>-1</sup> in the co-  
756 culture with *Ec-C* in the presence of streptomycin (10 µg mL<sup>-1</sup>), chloramphenicol (5 µg mL<sup>-1</sup>) or no  
757 antibiotic. Data points and lines represent experimental measurements and growth model fits to  
758 the data. Inset: Inferred doubling time based on the growth models. **(G)** Time-series  
759 measurements of extracellular chromosome DNA in the co-culture with *Ec-C*. Data points and  
760 lines denote experimental measurements and mean of biological replicates, respectively. **(H)**  
761 Time-series measurements of chromosome transformation frequency in the *Ec-C* and *B. subtilis*  
762 co-culture. Data points and lines denote experimental measurements and mean of biological  
763 replicates, respectively. All conditions were supplemented with 50 mM xylose.

764

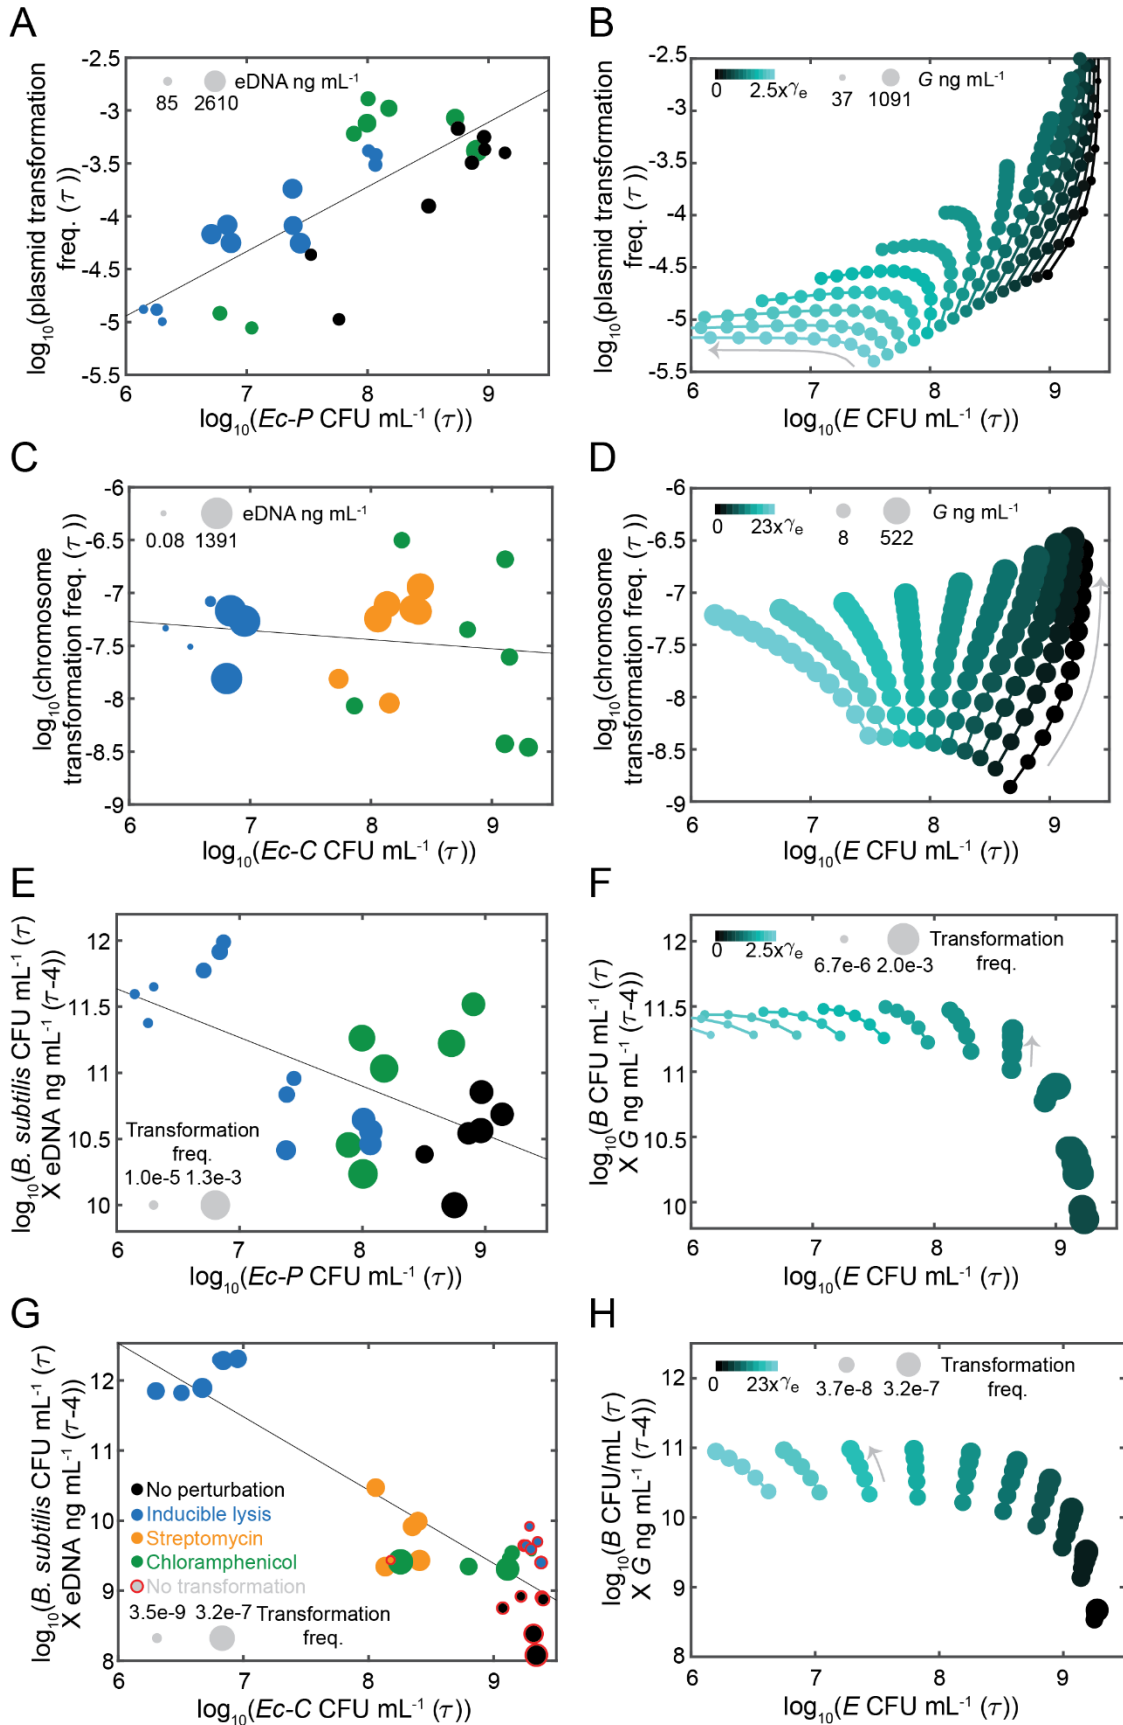

766 **Figure 5. Global trends in transformation frequency, *E. coli* CFU, *B. subtilis* CFU, and eDNA**  
767 **concentration across different experimental datasets. (A)** Scatter plot of *Ec-P* CFU mL<sup>-1</sup> and  
768 plasmid transformation frequency (Pearson correlation coefficient  $r = 0.78$ ,  $p$ -value =  $9.37e-7$ ).  
769 The size of each data point is proportional to the eDNA concentration. **(B)** Scatter plot of plasmid  
770 model prediction of the relationship between *E* concentration and transformation frequency for a  
771 broad range of *E* death rates  $\gamma_e$ . Data points connected by separate lines denote different values  
772 of  $\gamma_e$ . Gray arrow indicates the direction of time. **(C)** Scatter plot of *Ec-C* CFU mL<sup>-1</sup> and  
773 chromosome transformation frequency. The size of the data point is proportional to the eDNA  
774 concentration. **(D)** Scatter plot of chromosome model prediction of the relationship between *E*  
775 concentration and transformation frequency for a broad range of *E* death rates  $\gamma_e$ . Data points  
776 connected by separate lines denote different values of  $\gamma_e$ . Gray arrow indicates the direction of  
777 time. **(E)** Scatter plot of *Ec-P* CFU mL<sup>-1</sup> and the product of *B. subtilis* CFU mL<sup>-1</sup> and time-lagged  
778 eDNA concentration (Pearson correlation coefficient  $r = -0.61$ ,  $p$ -value =  $0.00163$ ). The size of  
779 each datapoint is proportional the transformation frequency. **(F)** Scatter plot of the plasmid model  
780 prediction of the relationship between *E* and the product of *B* and time-lagged *G* concentration  
781 across a broad range of *E* death rates  $\gamma_e$ . Data points connected by separate lines denote different  
782 values of  $\gamma_e$ . The size of each data point is proportional to the transformation frequency. Gray  
783 arrow indicates the direction of time. **(G)** Scatter plot of *Ec-C* CFU mL<sup>-1</sup> and the product of *B.*  
784 *subtilis* CFU mL<sup>-1</sup> and time-lagged extracellular chromosome concentration (Pearson correlation  
785 coefficient  $r = -0.89$ ,  $p$ -value =  $2.94e-11$ ). The size of each data point is proportional to the  
786 transformation frequency. Data points with red outlines denote measurements where no *B. subtilis*  
787 transformants were detected and the size of these data points are proportional to the detection  
788 limit. **(H)** Scatter plot of the chromosome model prediction of the relationship between *E* and the  
789 product of *B* and time-lagged *G* concentration across a broad range of *E* death rates  $\gamma_e$ . Data  
790 points connected by separate lines denote different values of  $\gamma_e$ . The size of each data point is  
791 proportional to the transformation frequency. The gray arrow indicates the direction of time. All  
792 conditions were supplemented with 50 mM xylose.

793

794

795

796

797

798

799

800

801

802

803

804
